# **Title page**

## **Autophagy Decreases Alveolar Epithelial Cell Injury by Suppressing the NF- $\kappa$ B Signaling Pathway and Regulating the Release of Inflammatory Mediators**

Tao Fan<sup>1</sup>, Shuo Yang<sup>2</sup>, Zhixin Huang<sup>3</sup>, Wei Wang<sup>1</sup>, Shize Pan<sup>1</sup>, Yao Xu<sup>1</sup>, Boyou Zhang<sup>4</sup>, Zhangfan Mao<sup>1</sup>, Yifan Fang<sup>1</sup>, Xiaobo Guo<sup>1</sup>, Hao Hu<sup>1</sup>, Qing Geng<sup>1\*</sup>

<sup>1</sup>Department of Thoracic Surgery, Renmin Hospital, Wuhan University, 238<sup>th</sup> Jiefang Road, Wuhan 430060, China

<sup>2</sup>Department of Cardiology, Renmin Hospital, Wuhan University, Cardiovascular Research Institute of Wuhan University, 238<sup>th</sup> Jiefang Road, Wuhan, 430060, China

<sup>3</sup>Department of Gynecology and Obstetrics, Renmin Hospital, Wuhan University, 238<sup>th</sup> Jiefang Road, Wuhan 430060, China

<sup>4</sup>Department of Emergency, Beijing Ji Shui Tan Hospital, 31 Xijiekou East Street, Xicheng District, Beijing, 100035, China

\*Corresponding author: Department of Thoracic Surgery, Renmin Hospital, Wuhan University, Wuhan 430060, China; [Tel: +027-88041911-82240](tel:+027-88041911-82240); fax: 027-88042292; e-mail:[szgqing@126.com](mailto:szgqing@126.com) (Q.G.)

Word count text: 2,403

Word count methods: 1,306

## Abstract

To research the impact of autophagy on alveolar epithelial cell inflammation and its possible mechanism in early stages of hypoxia, we established a cell hypoxia-reoxygenation model and orthotopic left lung ischemia-reperfusion model. Rat alveolar epithelial cells stably expressing GFP-LC3 were treated with an autophagy inhibitor (3-methyladenine, 3-MA) or autophagy promoter (rapamycin), followed by hypoxia-reoxygenation treatment at 2, 4 and 6h in vitro. In vivo, twenty-four male Sprague-Dawley rats were randomly divided into four groups (model group: no blocking of hilum in the left lung; control group: blocking of hilum in the left lung for 1h with DMSO lavage; 3-MA group: blocking of hilum in the left lung for 1h with 100ml/kg of 3-MA (5 $\mu$ mol/L) solution lavage; rapamycin group: blocking of hilum in the left lung for 1h with 100ml/kg of rapamycin (250nmol/L) solution lavage) to establish an orthotopic left lung ischemia model. This study demonstrated that rapamycin significantly suppressed the NF- $\kappa$ B signaling pathway, restrained the expression of pro-inflammatory factors. A contrary result was confirmed by 3-MA pretreatment. These findings indicate that autophagy reduces ischemia-reperfusion injury by repressing inflammatory signaling pathways in the early stage of hypoxia in vitro and in vivo. This could be a new protective method for lung ischemia-reperfusion injury.

## Key words

Inflammation; Autophagy; Hypoxia-reoxygenation; Ischaemia-reperfusion; Alveolar epithelial cell

## Introduction

Ischemia–reperfusion (I/R) inflammatory injury, which is characterized by free radical reaction, intracellular calcium overload and leukocyte activation, is a major predisposing factor for lung failure and sudden death in lung transplant operations. However, although intensive investigations of I/R injury in recent decades have promoted the identification of a series of cellular pathologies and improved the operation and survival rate of lung transplantation, many of the mechanisms have not been clarified. Therefore, a better understanding of the pathogenesis of I/R inflammatory injury and the identification of novel therapeutic methods are greatly needed.

I/R injury during lung transplantation involves the induction of genes associated with a number of cellular functions, including apoptosis, inflammation, and oxidative stress(1-3). After pretreatment with I/R, alveolar epithelial cells release inflammatory mediators such as reactive oxygen species (ROS), nitric oxide (NO), tumor necrosis factor  $\alpha$  (TNF- $\alpha$ ), interleukin-1 $\beta$  (IL-1 $\beta$ ) and interleukin-10 (IL-10)(4-9). Nuclear factor kappa B (NF- $\kappa$ B) is a transcription factor that is widely known to be associated with inflammatory responses following ischemia(10, 11). In the early stage of I/R, the activation of I $\kappa$ B kinase beta (IKK $\beta$ ), the most important kinase upstream of NF- $\kappa$ B, results in the phosphorylation and proteolysis of I $\kappa$ B $\alpha$ , which promote the expression of pro-inflammatory cytokines such as TNF- $\alpha$  and IL-1 $\beta$ (12). The positive feedback cascade in I/R leads to an excessive inflammatory response in the lung, which is the main cause of early complications in patients after lung transplantation. Therefore,

blocking the NF- $\kappa$ B signaling pathway is an effective strategy for reducing inflammatory injury during lung I/R(13, 14).

TNF- $\alpha$ , IL-1 $\beta$ , ICAM-1 and MCP-1 are downstream effects of the NF- $\kappa$ B signaling pathway, which are pro-inflammatory cytokines and can be measured to assess NF- $\kappa$ B activity(14-16). IL-10 is an anti-inflammatory cytokine that has a crucial role in preventing inflammatory and immune response(17, 18). In the present study, these inflammatory mediums were detected to verify inflammation activity.

Autophagy is an intracellular self-digesting pathway that delivers cytoplasmic constituents into the lysosome(19). Autophagy controls the turnover of proteins and organelles within cells to help in survival and longevity of cells in metabolic stress(20, 21). Early research indicated that autophagy could be induced by different conditions, including nutrient deprivation/starvation, oxidative stress, hypoxia, and chemotherapeutic drugs(3, 22-24). Autophagy also plays an important role in innate and adaptive immunity and can be regulated by different cytokines, such as TGF- $\beta$  or IL-6(25-28).

Autophagy, inflammatory cytokines and NF- $\kappa$ B signaling pathways are all involved in lung I/R inflammatory injury, but few researchers have determined its regulatory mechanism. The purpose of this study is to research the impact of autophagy on alveolar epithelial cell inflammatory injury in the early stage of hypoxia in vitro and in vivo and characterize its mechanism. Using an autophagy inhibitor (3-methyladenine, 3-MA) and autophagy promoter (rapamycin) to regulate autophagy levels, we demonstrate that exogenously enhancing autophagy significantly decreases

alveolar epithelial cell inflammatory injury by blocking the NF- $\kappa$ B signaling pathway, attenuating pro-inflammatory cytokine expression and increasing anti-inflammatory cytokine expression. These new findings could be a new protective method in lung ischemia-reperfusion inflammatory injury.

## Results

### Effect of 3-MA and rapamycin on GFP-LC3/CCL149 cell viability

The effect of different concentrations of autophagy inhibitor 3-MA and autophagy promoter rapamycin on GFP-LC3/CCL149 cell viability was detected by MTT assay. As shown in **Fig. 1C**, the cell inhibition rates were 14.3, 18.2 and 48.7% for 3-MA at 5, 10 and 15 $\mu$ mol/L, respectively. The cell inhibition rates were 2.3, 2.5 and 2.4% for rapamycin at 150, 200 and 250nmol/L, respectively. Therefore, 5 $\mu$ mol/L 3-MA and 250nmol/L rapamycin were chosen for further experiments.

### Fluorescence microscopy observation

The effect of 3-MA and rapamycin on autophagy formation in GFP-LC3/CCL149 cells was evaluated by observing autophagosomes under fluorescence microscopy following H/R treatment for 2, 4 and 6h (**Fig. 1A**). Green fluorescence indicated that GFP-LC3/CCL149 cells were successfully constructed. The cellular surface areas of GFP(+) cells were measured by immune staining after pretreating with DMSO, 3-MA (5 $\mu$ mol/L) and rapamycin (250nmol/L) followed by H/R treatment for 0, 2, 4 and 6h (**Fig. 1B**). Quantitative results of the green cell surface area of GFP (+) cells indicated that 3-MA decreased the expression of autophagy marker protein LC3. In contrast, rapamycin promoted the expression of

autophagy marker protein LC3.

### **Autophagy is inhibited by 3-MA and strengthened by rapamycin**

To research the impact of 3-MA and rapamycin on autophagy, we observed the formation of autophagosomes under transmission electron microscope in GFP-LC3/CCL149 cells after pretreatment with DMSO, 3-MA (5 $\mu$ mol/L) and rapamycin (250nmol/L) followed by H/R treatment for 0, 2, 4 and 6h. As shown in **Fig. 2**, autophagy activity was obviously enhanced in cells pretreated with rapamycin. Autophagosomes are indicated by arrows. We further measured the expression of autophagy-related gene LC3-II/I and Beclin1 in indicated groups. Western blotting results showed the protein levels of LC3-II/I and Beclin1 in GFP-LC3/CCL149 cells (**Fig. 3A**). The protein levels of LC3-II/I and Beclin1 were quantified and analyzed in the indicated groups(**Fig. 3B, C**).The protein levels of GFP-LC3 and Beclin1 in the 3-MA group were significantly lower than in the control group, and those in the rapamycin group were significantly higher than in the control group.

To further verified the effect of 3-MA and rapamycin on autophagy, we used flow cytometry assay to assess LC3-II in GFP-LC3/CCL149 cells after pretreatment with DMSO, 3-MA (5 $\mu$ mol/L) and rapamycin (250nmol/L) followed by H/R treatment for 0, 2, 4 and 6h. As shown in **Fig. 3D**, the trend of the results was consistent with that of western blot assay and transmission electron microscope assay. The percentage of cells with endogenous LC3 in the rapamycin pretreated group was significantly increased compared to that of the DMSO group and 3-MA group.

**NF- $\kappa$ B was repressed by an autophagy promoter and enhanced by an autophagy**

# **inhibitor at an early stage of GFP-LC3/CCL149 cell H/R**

To research the impact of autophagy on inflammation at early stages of H/R, we measured the NF- $\kappa$ B signaling pathway by immunohistochemistry in GFP-LC3/CCL149 cells after pretreatment with DMSO, 3-MA (5 $\mu$ mol/L) and rapamycin (250nmol/L) followed by H/R treatment for 0, 2, 4 and 6h (**Fig. 4A**). Immunohistochemical analysis revealed that NF- $\kappa$ B integrated optical density in 3-MA group was significantly higher than in the control group and in the rapamycin group was significantly lower than in the control group (**Fig. 4C**). We further measured the protein expression of NF- $\kappa$ B in the indicated groups (**Fig. 4B**). The protein levels of NF- $\kappa$ B were quantified and analyzed (**Fig. 4D**). The results suggested that strengthening autophagy suppressed NF- $\kappa$ B protein expression, which indicated that exogenously enhancing autophagy reduced inflammation injury by suppressing the NF- $\kappa$ B signaling pathway in alveolar epithelial cell hypoxia-reoxygenation.

# **I $\kappa$ B was enhanced by an autophagy promoter and repressed by an autophagy inhibitor at an early stage of GFP-LC3/CCL149 cell H/R**

To further verify the impact of autophagy on the NF- $\kappa$ B signaling pathway at an early stage of H/R, we further detected the I $\kappa$ B expression. We measured I $\kappa$ B by immunohistochemistry in GFP-LC3/CCL149 cells after pretreatment with DMSO, 3-MA (5 $\mu$ mol/L) and rapamycin (250nmol/L) followed by H/R treatment for 0, 2, 4 and 6h (**Fig. 5A**). I $\kappa$ B integrated optical density in the 3-MA group was significantly lower than in the control group and that in the rapamycin group was significantly

higher than in the control group (**Fig. 5C**). We further measured the protein expression of I $\kappa$ B in the indicated groups (**Fig. 5B**). The protein levels of I $\kappa$ B were quantified and analyzed (**Fig. 5D**). The results suggested that strengthening autophagy increased I $\kappa$ B protein expression, which indicated that exogenously enhancing autophagy reduced inflammation injury by increasing I $\kappa$ B expression in alveolar epithelial cell hypoxia-reoxygenation.

### **Effect of autophagy on inflammatory factors at an early stage of GFP-LC3/CCL149 cell H/R**

In addition to the NF- $\kappa$ B signaling pathway, we also examined the influence of autophagy on downstream effects of the NF- $\kappa$ B signaling pathway in GFP-LC3/CCL149 cells after pretreatment with DMSO, 3-MA (5 $\mu$ mol/L) and rapamycin (250nmol/L) followed by H/R treatment for 0, 2, 4 and 6h. After determining the concentration of each cellular factor using a spectrophotometer (**Fig. 6A, C, E, G, I**), we measured pro-inflammatory factors TNF- $\alpha$  and IL-1 $\beta$ , MCP-1, ICAM-1 and anti-inflammatory cytokine IL-10 by ELISA kits (**Fig. 6B, D, F, H, J**). The result indicated that enhancing autophagy restrained pro-inflammatory factor expression and increased anti-inflammatory cytokine expression.

### **Autophagy activity was inhibited by 3-MA and strengthened by rapamycin in alveolar epithelial cells in rat lung I/R**

To further illuminate whether autophagy activity is regulated by 3-MA and rapamycin in alveolar epithelial cells in rat lung I/R, we lavaged rat lungs with DMSO, 3-MA or rapamycin during lung ischemia for 1h and then reperfusion for 2h. The



model group was not treated with ischemia. Subsequently, we observed the formation of autophagosomes under a transmission electron microscope (**Fig. 7A**) and detected the expression of autophagy-related gene GFP-LC3 and Beclin1 by Western blotting (**Fig. 7B**). The protein levels of GFP-LC3 and Beclin1 were quantified and analyzed in the indicated groups (**Fig. 7C, D**). The protein levels of GFP-LC3 and Beclin1 in the 3-MA group were significantly lower than in the control group, and those in the rapamycin group were significantly higher than in the control group.

#### **The NF- $\kappa$ B signaling pathway was restrained by autophagy in alveolar epithelial cell in rat lung I/R**

To gain insight into the effect of autophagy on the NF- $\kappa$ B signaling pathway in rat lung I/R, we lavaged rat lungs with autophagy promotor (rapamycin) or inhibitor (3-MA) during lung ischemia for 1h and then reperused for 2h. The model group was not treated with ischemia. NF- $\kappa$ B and I $\kappa$ B were measured by immunohistochemistry (**Fig. 8A**). Immunohistochemical analysis revealed that strengthening autophagy suppressed NF- $\kappa$ B protein expression and increased I $\kappa$ B protein expression (**Fig. 8B**). Western blotting results showed the protein levels of NF- $\kappa$ B and I $\kappa$ B in lung tissues from Lewis rats after pretreatment with I/R (**Fig. 8C**). The protein levels of NF- $\kappa$ B and I $\kappa$ B were quantified and analyzed in the indicated groups (**Fig. 8D, E**). These results further revealed that exogenously enhancing autophagy reduced inflammation injury by suppressing the NF- $\kappa$ B signaling pathway in alveolar epithelial cells in rat lung I/R.

#### **Effect of autophagy on inflammatory factors in alveolar epithelial cells in rat**

## lung I/R

To obtain further knowledge regarding the mechanisms of autophagy reducing alveolar epithelial cell inflammation injury in oxygen deficiency, we detected inflammatory factors in rat lung I/R, which were lavaged with DMSO, 3-MA or rapamycin during lung ischemia for 1h and then reperfusion for 2h. The pro-inflammatory factors TNF- $\alpha$  and IL-1 $\beta$ , MCP-1 and ICAM-1 in the 3-MA group were significantly higher than in the control group, and those in the rapamycin group were significantly lower than in the control group (**Fig. 9A, C, D**). In contrast, anti-inflammatory factor IL-10 showed an increasing trend with enhanced autophagy levels (**Fig. 9B**). The result indicated that enhancing autophagy can lessen inflammatory injury by restraining the expression of pro-inflammatory factors and increasing anti-inflammatory cytokine expression.

## Discussion

Lung ischemia reperfusion (I/R) is a frequent event in clinic processes, inducing distant organ dysfunction, especially lung transplantation or acute pulmonary tissue injury. The release of pro-inflammatory cytokines during I/R is one of the most important factors that lead to lung failure(29). Our team has proved that exogenously enhancing autophagy decreased alveolar macrophages apoptosis by attenuating endoplasmic reticulum stress and oxidative stress in hypoxia-reoxygenation or ischemia-reperfusion injury(30). In this study, we established a cell model of alveolar epithelial cell hypoxia-reoxygenation (H/R) and a rat model of focal lung I/R. For the first time, the present study reveals that rapamycin decreases alveolar epithelial cell

inflammatory injury by blocking the NF- $\kappa$ B signaling pathway, attenuating the expression of pro-inflammatory cytokines TNF- $\alpha$ , IL-1 $\beta$ , ICAM-1 and MCP-1 and increasing the expression of anti-inflammatory cytokine IL-10. Based on various in vivo and in vitro tissue ischemia and cell hypoxia models, we clearly identified that exogenously enhancing autophagy as a positive regulator of alveolar epithelial cells and lungs responding to oxygen deficiency via blockade of the NF- $\kappa$ B signaling pathway attenuate pro-inflammatory cytokine expression and increase anti-inflammatory cytokine expression.

It has been confirmed that inflammation is an important component of lung I/R. Previous studies demonstrated that inflammatory cytokine infiltration into the lungs during I/R injury participates in the pathogenesis of acute lung failure, especially in patients after lung transplantation. Previous studies have demonstrated that the NF- $\kappa$ B pathway involved in lung disease is induced by I/R(13, 15, 16). NF- $\kappa$ B is combined with the inhibitory unit inhibitory  $\kappa$ B (I $\kappa$ B) and is located in the cytoplasm. When I $\kappa$ B is phosphorylated by its kinase I $\kappa$ B kinase (IKK), NF- $\kappa$ B could trigger multiple downstream effects including activation of pro-inflammatory cytokines (TNF- $\alpha$  and IL-1 $\beta$ ), ICAM-1 and MCP-1 accumulation, and the infiltration of immune cells in ischemic tissues(31-35). It is also reported that IL-10 can block transepithelial migration of neutrophils(36, 37), which is tightly related to inflammatory and autoimmune pathologies(17). Therefore, inhibiting the inflammatory response is an effective therapeutic method to improve lung I/R injury.

To the best of our knowledge, the present study is the first to show that

exogenously enhancing autophagy markedly stimulates the expression of anti-inflammatory cytokine IL-10 at an early stage of hypoxia in vitro and in vivo. Furthermore, the NF- $\kappa$ B signaling pathway and its downstream effects on expression were significantly inhibited by rapamycin under conditions of oxygen deficit. The current results suggested that an autophagy promoter could be a new protective method in lung inflammatory injury induced by ischemia-reperfusion.

## **Materials and Methods**

### **Cell culture**

For the in vitro studies, the alveolar epithelial cell line CCL149 (ATCC, Manassas, VA, USA, #CCL149) was chosen as the cell model. The cells were maintained in F-12K medium (ATCC, Manassas, VA, USA) supplemented with 20% fetal bovine serum (FBS, Invitrogen, Carlsbad, CA, USA) at 37°C in a humidified 5% CO<sub>2</sub> atmosphere. Additionally, 10% heat-inactivated fetal calf serum was contained in the medium. When the cells reached 80% confluence, they were digested with 0.25% trypsin.

### **Constructing a stable GFP-LC3/CCL149 cell line**

Briefly, the GFP-LC3 plasmid (Addgene, Cambridge, MA, USA) was transfected into CCL149 cells by applying Lipofectamine 2000 reagent (Invitrogen, Carlsbad, CA, USA). The experiment was conducted in accordance with the instructions. Twenty-four hours later, the cells were transferred to culture in F-12K medium containing 300 µg/ml of G418 (Invitrogen, Carlsbad, CA, USA). After 2 weeks of expansion, the CCL149 cells were observed under a fluorescence

microscope (Olympus, Japan), and the strong green fluorescent colonies were selected as stable GFP-LC3/CCL149 cells and cultured in medium containing 100µg/ml of G418 and 10% FBS for further experiments in the study.

# **MTT assay**

The general viability of the cells was measured using an MTT assay(38). The percentage of cell viability inhibition was calculated as: cell viability = [OD (treated) –OD (control)]/OD (control) × 100.

# **Animal models and procedures**

All the animal experimental protocols were approved by the Animal Care and Use Committee of Renmin Hospital of Wuhan University and were conducted in accordance with the National Institutes of Health (NIH) Guide for the Care and Use of Laboratory Animals

Male Sprague-Dawley (SD) rats (8weeks old, 250-300g) were fed a standard diet and maintained in a controlled environment of the animal center. In brief, rats were anesthetized by an intraperitoneal injection of 10% chloral hydrate (300mg/kg body weight) and placed in a supine position. The animals were then intubated for artificial ventilation with oxygen using a small animal breathing machine (5 ml tidal volume, frequency of 70 per min) and electrocardiograph monitoring. Thoracotomy was performed at the anterior lateral side of the left fourth intercostal. The muscular layer and pleura were gently dissected to expose the heart and lung. Then, the hilum of the left lung was dissociated, and an artery clamp was used to pass through the hilum of the lung from the upper right to the lower left. The whole clamped left hilum was

clearly exposed by slightly stirring up the clamp. Twenty-four SD rats were randomly divided into four groups (5 rats/group) as follows: (1) model group: no blocking of hilum in the left lung; control group: blocking of hilum in the left lung for 1h with DMSO lavage and then reperfusion for 2h; 3-MA group: blocking of hilum in the left lung for 1h with 100ml/kg of 3-MA (5 $\mu$ mol/L) solution lavage and then reperfusion for 2h; (4) rapamycin group: blocking of hilum in the left lung for 1h with 100ml/kg of rapamycin (250nmol/L) solution lavage and then reperfusion for 2h. Rats in the four groups were sacrificed after the experiment. The left lung tissue of the rats was dissected for further analysis.

### **Immunofluorescence analysis**

The cell surface area of GFP-LC3/CCL149 cells was assessed by immunofluorescent staining. Briefly, after the hypoxia-reoxygenation (H/R) for 0, 2, 4 or 6 h, the cells were subsequently fixed with 4% paraformaldehyde (Sigma, USA, #158127), permeabilized with 0.1% Triton X-100/BS for 45 min and then stained with  $\beta$ -actin (1:100 dilution), followed by a fluorescent secondary antibody. The surface areas were measured using Image-Pro Plus6.0 software. Images were captured using a special fluorescence microscope (Olympus, Japan).

### **Transmission electron microscope**

In vitro, cells were fixed with 2.5% glutaraldehyde at 4°C overnight after the H/R treatment for 2, 4 or 6h and then fixed with 1% osmic acid. After being dehydrated with a graded series of ethanol (50, 70, 80, 95, and 100%; each for 15 min) and acetone (twice; each for 15 min), the cells were embedded in epoxide resin.

Ultra-thin sections were generated using an ultra-microtome (LKB-V, Bromma, Sweden) followed by staining with uranyl acetate and lead citrate. Then, sections were observed and photographed under a transmission electron microscope (H-600, Hitachi, Tokyo, Japan).

In vivo, paraffin-embedded lungs were cut transversely into 0.1µm sections. Then, the sections were observed and photographed under a transmission electron microscope (H-600, Hitachi, Tokyo, Japan).

### **Flow cytometry**

GFP-LC3/CCL149 cells were harvested with DMSO, 3-MA or rapamycin, and washed with PBS containing 0.05% saponin. For intracellular staining of endogenous LC3, CCL149 cells were harvested with trypsin, rinsed with culture medium and PBS, and rinsed with PBS containing 0.05% saponin. Cells were then incubated with mouse anti-LC3 primary antibody (Abcam, Ab290) for 20 minutes, rinsed with PBS, incubated with goat antimouse secondary antibody conjugated to R-Phycoerythrin (BosterBiotech, BA1060) for 20 minutes, and rinsed twice with PBS. More than 30,000 events were captured for every analysis. Fluorescence activated cell sorter data were collected using a fluorescence activated cell sorter Calibur flow cytometer (Becton Dickinson) with Cell Quest Pro software. This method was previously published in ref(39).

### **Immunohistochemical analysis**

For immunohistochemistry in vitro, GFP-LC3/CCL149 cells growing on glass cover slips were fixed for 15min with 4% paraformaldehyde. After being incubated

with 0.5% Triton X-100/PBS solution for 30 min and washed with PBS three times, the GFP-LC3/CCL149 cells were blocked with 3% hydrogen peroxide for 15 min and subsequently incubated overnight at 4 °C with the primary antibodies. Binding was visualized with the appropriate peroxidase-conjugated secondary antibodies (AR1022, ZSGB-BIO) for 20-30 min at 37 °C.

For immunohistochemistry in vivo, paraffin-embedded lungs were cut transversely into 5µm sections. Following a 5min high-pressure antigen retrieval process in 0.1mol/L citrate buffer with a pH of 6.0, the lung sections were blocked with 3% hydrogen peroxide for 15 min and subsequently incubated overnight at 4 °C with the primary antibodies. Binding was visualized with the appropriate peroxidase-conjugated secondary antibodies (AR1022, ZSGB-BIO) for 20-30 min at 37 °C.

### **Western blotting analysis**

Total proteins were extracted from GFP-LC3/CCL149 cells and rat lung tissues in lysis buffer. The protein concentrations were determined using a Pierce Bicinchoninic Acid Protein Assay kit (Biyuntian, Shanghai, China, #P0010). Fifty micrograms of protein was subjected to SDS–polyacrylamide gel electrophoresis (12%PAGE; Amresco) and transferred to a polyvinylidene fluoride membrane (Millipore) followed by incubation overnight at 4 °C with the following primary antibodies: LC3 (Abcam, Cambridge, United Kingdom, #ab62341; 1:200 dilution), Beclin-1 (Santa Cruz, CA, USA, #sc-11427; 1:200 dilution), NF-κB (Bioworld, CA, USA, #BS1257; 1:600 dilution), and IκB-α (Bioworld, CA, USA, #BS3601; 1:600



dilution). After incubation with peroxidase-conjugated secondary antibodies (BA1060, at 1:50,000 dilution), the bands were visualized using Bio-Rad Chemi Doc™ XRS+ (Bio-Rad). Protein expression levels were normalized to the corresponding  $\beta$ -actin levels.

## **ELISA measurements of cytokines in rat lung tissues and GFP-LC3/CCL149 cells**

Rat lung tissues were washed and then homogenized on ice with normal saline. Homogenates from rat lung tissues or GFP-LC3/CCL149 cell culture supernatants were centrifuged at 12000rpm for 10min at 4 C, and the supernatants (100 $\mu$ L) were used for analysis. The levels of tumor necrosis factor- $\alpha$  (TNF- $\alpha$ ), interleukin-1 $\beta$  (IL-1 $\beta$ ), interleukin-10 (IL-6), macrophage chemoattractant protein-1 (MCP-1) and intercellular adhesion molecule-1 (ICAM-1) were measured by enzyme-linked immunosorbent assay (ELISA) kits (Elabscience, USA) in triplicate according to the manufacturer's recommended protocol.

## **Statistical Analysis**

All data are presented as the mean $\pm$  s.d. from at least three independent experiments. Student's two-tailed *t*-test was used to compare the means of two-group samples. Two-way analysis of variance (ANOVA) was applied for the comparison of multiple groups in different H/R times. A one-way analysis of variance (ANOVA) was applied to determine the significant effect of 3-MA or rapamycin on studied rats pretreated with lung I/R followed by the least significant difference (equal variances assumed) or Tamhane's T2 (equal variances not assumed) tests. All statistical analyses

were performed using the *Graph Pad Prism5* software. *P* values less than 0.05 were considered significant. No statistical method was used to predetermine sample size. Randomization and a blinding strategy were used whenever possible.

### **Competing interests**

The authors declare no conflict of interest.

### **Acknowledgements**

We are grateful to the model organism collaborative innovation center of Wuhan University for its support with homologous male rats. We are grateful to the instruments of the school of life sciences at Wuhan University. This work was supported by award from the National Science Foundation of China Grants 81770095(to Q.G.), 81170076(to Q.G.), and 81700093(to T.F.).

### **References**

1. **Liu S, Zhang J, Yu B, Huang L, Dai B, Liu J, Tang J.** 2016. The role of autophagy in lung ischemia/reperfusion injury after lung transplantation in rats. *American journal of translational research* **8**:3593-3602.
2. **Simmons LJ, Surles-Zeigler MC, Li Y, Ford GD, Newman GD, Ford BD.** 2016. Regulation of inflammatory responses by neuregulin-1 in brain ischemia and microglial cells in vitro involves the NF-kappa B pathway. *Journal of neuroinflammation* **13**:237.
3. **Fan T, Huang Z, Chen L, Wang W, Zhang B, Xu Y, Pan S, Mao Z, Hu H, Geng Q.** 2016. Associations between autophagy, the ubiquitin-proteasome system and endoplasmic reticulum stress in hypoxia-deoxygenation or

- 399            ischemia-reperfusion. European journal of pharmacology **791**:157-167.
- 400    4.        **Fisher AB, Al-Mehdi AB, Muzykantov V.** 1999. Activation of endothelial
- 401            NADPH oxidase as the source of a reactive oxygen species in lung ischemia.
- 402            Chest **116**:25s-26s.
- 403    5.        **Kennedy TP, Rao NV, Hopkins C, Pennington L, Tolley E, Hoidal JR.**
- 404            1989. Role of reactive oxygen species in reperfusion injury of the rabbit lung.
- 405            The Journal of clinical investigation **83**:1326-1335.
- 406    6.        **Ucar G, Topaloglu E, Kandilci HB, Gumusel B.** 2005. Effect of ischemic
- 407            preconditioning on reactive oxygen species-mediated ischemia--reperfusion
- 408            injury in the isolated perfused rat lung. Clinical biochemistry **38**:681-684.
- 409    7.        **Hansen LW, Khader A, Yang WL, Prince JM, Nicastro JM, Coppa GF,**
- 410            **Wang P.** 2016. SIRTUIN 1 ACTIVATOR SRT1720 PROTECTS AGAINST
- 411            ORGAN            INJURY            INDUCED            BY            INTESTINAL
- 412            ISCHEMIA-REPERFUSION. Shock (Augusta, Ga.) **45**:359-366.
- 413    8.        **Zhang H, Wan Z, Yan X, Wang DG, Leng Y, Liu Y, Zhang Y, Zhang H,**
- 414            **Han X.** 2016. Protective effect of Shenfu injection preconditioning on lung
- 415            ischemia-reperfusion injury. Experimental and therapeutic medicine
- 416            **12**:1663-1670.
- 417    9.        **Zhao Q, Wu J, Hua Q, Lin Z, Ye L, Zhang W, Wu G, Du J, Xia J, Chu M,**
- 418            **Hu X.** 2016. Resolvin D1 mitigates energy metabolism disorder after
- 419            ischemia-reperfusion of the rat lung. Journal of translational medicine **14**:81.
- 420    10.        **Hayden MS, Ghosh S.** 2008. Shared principles in NF-kappaB signaling. Cell

- 421           **132:344-362.**
- 422   11.   **Nurmi A, Lindsberg PJ, Koistinaho M, Zhang W, Juettler E,**  
423           **Karjalainen-Lindsberg ML, Weih F, Frank N, Schwaninger M,**  
424           **Koistinaho J.** 2004. Nuclear factor-kappaB contributes to infarction after  
425           permanent focal ischemia. *Stroke; a journal of cerebral circulation*  
426           **35:987-991.**
- 427   12.   **Zhan J, Qin W, Zhang Y, Jiang J, Ma H, Li Q, Luo Y.** 2016. Upregulation  
428           of neuronal zinc finger protein A20 expression is required for  
429           electroacupuncture to attenuate the cerebral inflammatory injury mediated by  
430           the nuclear factor-kB signaling pathway in cerebral ischemia/reperfusion rats.  
431           *Journal of neuroinflammation* **13:258.**
- 432   13.   **Tian XF, Yao JH, Zhang XS, Zheng SS, Guo XH, Wang LM, Wang ZZ,**  
433           **Liu KX.** 2010. Protective effect of carnosol on lung injury induced by  
434           intestinal ischemia/reperfusion. *Surgery today* **40:858-865.**
- 435   14.   **Fan Z, Yao J, Li Y, Hu X, Shao H, Tian X.** 2015. Anti-inflammatory and  
436           antioxidant effects of curcumin on acute lung injury in a rodent model of  
437           intestinal ischemia reperfusion by inhibiting the pathway of NF-Kb.  
438           *International journal of clinical and experimental pathology* **8:3451-3459.**
- 439   15.   **Tian XF, Zhang XS, Li YH, Wang ZZ, Zhang F, Wang LM, Yao JH.** 2006.  
440           Proteasome inhibition attenuates lung injury induced by intestinal ischemia  
441           reperfusion in rats. *Life sciences* **79:2069-2076.**
- 442   16.   **Tian XF, Yao JH, Li YH, Zhang XS, Feng BA, Yang CM, Zheng SS.** 2006.

- Effect of nuclear factor kappa B on intercellular adhesion molecule-1 expression and neutrophil infiltration in lung injury induced by intestinal ischemia/reperfusion in rats. *World journal of gastroenterology* **12**:388-392.
17. **Saraiva M, O'Garra A.** 2010. The regulation of IL-10 production by immune cells. *Nature reviews. Immunology* **10**:170-181.
18. **Shouval DS, Biswas A, Goettel JA, McCann K, Conaway E, Redhu NS, Mascanfroni ID, Al Adham Z, Lavoie S, Ibourk M, Nguyen DD, Samsom JN, Escher JC, Somech R, Weiss B, Beier R, Conklin LS, Ebens CL, Santos FG, Ferreira AR, Sherlock M, Bhan AK, Muller W, Mora JR, Quintana FJ, Klein C, Muise AM, Horwitz BH, Snapper SB.** 2014. Interleukin-10 receptor signaling in innate immune cells regulates mucosal immune tolerance and anti-inflammatory macrophage function. *Immunity* **40**:706-719.
19. **Ktistakis NT, Tooze SA.** 2016. Digesting the Expanding Mechanisms of Autophagy. *Trends in cell biology* **26**:624-635.
20. **Wu Y, Li Y, Zhang H, Huang Y, Zhao P, Tang Y, Qiu X, Ying Y, Li W, Ni S, Zhang M, Liu L, Xu Y, Zhuang Q, Luo Z, Benda C, Song H, Liu B, Lai L, Liu X, Tse HF, Bao X, Chan WY, Esteban MA, Qin B, Pei D.** 2015. Autophagy and mTORC1 regulate the stochastic phase of somatic cell reprogramming. *Nature cell biology* **17**:715-725.
21. **Ashkenazi A, Bento CF, Ricketts T, Vicinanza M, Siddiqi F, Pavel M, Squitieri F, Hardenberg MC, Imarisio S, Menzies FM, Rubinsztein DC.**

- 465 2017. Polyglutamine tracts regulate beclin 1-dependent autophagy. *Nature*  
466 **545**:108-111.
- 467 22. **Chen Z, Teo AE, McCarty N.** 2016. ROS-Induced CXCR4 Signaling  
468 Regulates Mantle Cell Lymphoma (MCL) Cell Survival and Drug Resistance  
469 in the Bone Marrow Microenvironment via Autophagy. *Clinical cancer*  
470 *research : an official journal of the American Association for Cancer Research*  
471 **22**:187-199.
- 472 23. **Kongara S, Karantza V.** 2012. The interplay between autophagy and ROS in  
473 tumorigenesis. *Frontiers in oncology* **2**:171.
- 474 24. **Mizushima N, Yoshimori T, Levine B.** 2010. Methods in mammalian  
475 autophagy research. *Cell* **140**:313-326.
- 476 25. **Chang PC, Wang TY, Chang YT, Chu CY, Lee CL, Hsu HW, Zhou TA,**  
477 **Wu Z, Kim RH, Desai SJ, Liu S, Kung HJ.** 2014. Autophagy pathway is  
478 required for IL-6 induced neuroendocrine differentiation and chemoresistance  
479 of prostate cancer LNCaP cells. *PloS one* **9**:e88556.
- 480 26. **Saitoh T, Fujita N, Jang MH, Uematsu S, Yang BG, Satoh T, Omori H,**  
481 **Noda T, Yamamoto N, Komatsu M, Tanaka K, Kawai T, Tsujimura T,**  
482 **Takeuchi O, Yoshimori T, Akira S.** 2008. Loss of the autophagy protein  
483 Atg16L1 enhances endotoxin-induced IL-1beta production. *Nature*  
484 **456**:264-268.
- 485 27. **Delk NA, Farach-Carson MC.** 2012. Interleukin-6: a bone marrow stromal  
486 cell paracrine signal that induces neuroendocrine differentiation and modulates

- 487 autophagy in bone metastatic PCa cells. *Autophagy* **8**:650-663.
- 488 28. **Suzuki HI, Kiyono K, Miyazono K.** 2010. Regulation of autophagy by  
489 transforming growth factor-beta (TGF-beta) signaling. *Autophagy* **6**:645-647.
- 490 29. **Kim K, Li Y, Jin G, Chong W, Liu B, Lu J, Lee K, Demoya M, Velmahos**  
491 **GC, Alam HB.** 2012. Effect of valproic acid on acute lung injury in a rodent  
492 model of intestinal ischemia reperfusion. *Resuscitation* **83**:243-248.
- 493 30. **Fan T, Chen L, Huang Z, Mao Z, Wang W, Zhang B, Xu Y, Pan S, Hu H,**  
494 **Geng Q.** 2016. Autophagy decreases alveolar macrophage apoptosis by  
495 attenuating endoplasmic reticulum stress and oxidative stress. *Oncotarget*  
496 **7**:87206-87218.
- 497 31. **Wang J, Fa J, Wang P, Jia X, Peng H, Chen J, Wang Y, Wang C, Chen Q,**  
498 **Tu X, Wang QK, Xu C.** 2017. NINJ2- A novel regulator of endothelial  
499 inflammation and activation. *Cellular signalling* **35**:231-241.
- 500 32. **He M, Wang C, Sun JH, Liu Y, Wang H, Zhao JS, Li YF, Chang H, Hou**  
501 **JM, Song JN, Li AY, Ji ES.** 2017. Roscovitine attenuates intimal hyperplasia  
502 via inhibiting NF-kappaB and STAT3 activation induced by TNF-alpha in  
503 vascular smooth muscle cells. *Biochemical pharmacology* **137**:51-60.
- 504 33. **Yao JH, Zhang XS, Zheng SS, Li YH, Wang LM, Wang ZZ, Chu L, Hu**  
505 **XW, Liu KX, Tian XF.** 2009. Prophylaxis with carnosol attenuates liver  
506 injury induced by intestinal ischemia/reperfusion. *World journal of*  
507 *gastroenterology* **15**:3240-3245.
- 508 34. **Wu H, Chen G, Wyburn KR, Yin J, Bertolino P, Eris JM, Alexander SI,**

- 509       **Sharland AF, Chadban SJ.** 2007. TLR4 activation mediates kidney  
510       ischemia/reperfusion injury. The Journal of clinical investigation  
511       **117**:2847-2859.
- 512   35.   **Besson B, Sonthonnax F, Duchateau M.** 2017. Regulation of NF-kappaB by  
513       the p105-ABIN2-TPL2 complex and RelAp43 during rabies virus infection.  
514       **13**:e1006697.
- 515   36.   **Kulkarni U, Karsten CM, Kohler T, Hammerschmidt S, Bommert K,**  
516       **Tiburzy B, Meng L, Thieme L, Recke A, Ludwig RJ, Pollok K, Kalies K,**  
517       **Bogen B, Boettcher M, Kamradt T, Hauser AE, Langer C, Huber-Lang**  
518       **M, Finkelman FD, Kohl J, Wong DM, Manz RA.** 2016. IL-10 mediates  
519       plasmacytosis-associated immunodeficiency by inhibiting  
520       complement-mediated neutrophil migration. The Journal of allergy and  
521       clinical immunology **137**:1487-1497.e1486.
- 522   37.   **Ajuebor MN, Das AM, Virag L, Flower RJ, Szabo C, Perretti M.** 1999.  
523       Role of resident peritoneal macrophages and mast cells in chemokine  
524       production and neutrophil migration in acute inflammation: evidence for an  
525       inhibitory loop involving endogenous IL-10. Journal of immunology  
526       (Baltimore, Md. : 1950) **162**:1685-1691.
- 527   38.   **Adil MD, Kaiser P, Satti NK, Zargar AM, Vishwakarma RA, Tasduq SA.**  
528       2010. Effect of *Emblica officinalis* (fruit) against UVB-induced photo-aging in  
529       human skin fibroblasts. Journal of ethnopharmacology **132**:109-114.
- 530   39.   **Eng KE, Panas MD, Karlsson Hedestam GB, McInerney GM.** 2010. A



531 novel quantitative flow cytometry-based assay for autophagy. Autophagy

532 **6**:634-641.

533

534

## Figure legends

**Fig. 1.** Effect of 3-MA and rapamycin on autophagy formation and GFP-LC3/CCL149 cell viability.

(A) Representative fluorescence microscopic images of GFP-LC3/CCL149 cells pretreated with 3-MA or rapamycin followed by H/R treatment for 0, 2, 4 and 6h. Scale bars, 40µm.

(B) Quantitative results of the green cell surface area of LC3-GFP/CCL149 cells followed by H/R treatment for 0, 2, 4 and 6h in response to DMSO, 3-MA or rapamycin.

(C) Impact of 3-MA and rapamycin on LC3-GFP/CCL149 cell viability. The cells are treated with different concentrations of 3-MA (5, 10 and 15µmol/L) and rapamycin (150, 200 and 250 nmol/L) for 48h. The control cells are treated with an equal volume of DMSO. MTT assays are used to measure cell viability. The cell inhibition rate (%) is calculated by dividing control values. \* $p \geq 0.05$  compared to control at 0h; # $p < 0.05$  compared to control at 2, 4 and 6h.

**Fig. 2.** Transmission electron microscope evaluating the effect of 3-MA and rapamycin on autophagosomes in alveolar epithelial cells treated with H/R. The cells are pretreated with 3-MA (5µmol/L) or rapamycin (250nmol/L) followed by H/R treatment for 0, 2, 4 and 6h. Scale bars, 500nm. The cell ultrastructure is observed under a transmission electron microscope. Arrowheads point to intracellular autophagy.

**Fig. 3.** Effect of 3-MA and rapamycin on expression of LC3-II/I and Beclin1 in

alveolar epithelial cells treated with H/R.

(A) Western blots showing the protein of LC3-II/I and Beclin1 in LC3-GFP/CCL149 cells pretreated with DMSO, 3-MA and rapamycin followed by H/R treatment for 0, 2, 4 and 6 h.

(B, C) The protein levels of GFP-LC3(b) and Beclin1(c) in LC3-GFP/CCL149 cells were quantified and analyzed in the indicated groups.  $*p \geq 0.05$  compared to control at 0h;  $\#p < 0.05$  compared to control at 2, 4 and 6h.

(D) Flow cytometry was used to measure flux of endogenous LC3 protein. Pretreated with rapamycin exerted a higher level of EGFP-LC3-II-containing autophagosomes.

**Fig. 4.** Enhanced autophagy decreases H/R-induced expression of NF- $\kappa$ B in alveolar epithelial cells treated with H/R.

(A) Representative images of immunohistochemistry with anti-NF- $\kappa$ B antibody in LC3-GFP/CCL149 cells pretreated with DMSO, 3-MA and rapamycin followed by H/R treatment for 0, 2, 4 and 6h(n=5/group; scale bar, 30 $\mu$ m).

(B) Western blots showing the protein expression of NF- $\kappa$ B in the indicated groups.

(C) Immunohistochemistry analysis of the protein expressions of NF- $\kappa$ B in LC3-GFP/CCL149 cells in the indicated groups.

(D) The protein levels of NF- $\kappa$ B in LC3-GFP/CCL149 cells were quantified and analyzed.  $*p \geq 0.05$  compared to control at 0h;  $\#p < 0.05$  compared to control at 2,4 and 6h.

**Fig. 5.** Enhanced autophagy increases anti-inflammatory factor expression of I $\kappa$ B in alveolar epithelial cells treated with H/R.

(A) Representative images of immunohistochemistry with anti-I $\kappa$ B antibody in LC3-GFP/CCL149 cells pretreated with DMSO, 3-MA and rapamycin followed by H/R treatment for 0, 2, 4 and 6h(n=5/group; scale bar, 30 $\mu$ m).

(B) Western blots showing the protein expression of I $\kappa$ B in the indicated groups.

(C) Immunohistochemistry analysis of the protein expression of I $\kappa$ B in LC3-GFP/CCL149 cells in the indicated groups.

(D) The protein levels of I $\kappa$ B in LC3-GFP/CCL149 cells were quantified and analyzed. \* $p \geq 0.05$  compared to control at 0h; # $p < 0.05$  compared to control at 2,4 and 6h.

**Fig. 6.** Enhanced autophagy suppresses H/R-induced pro-inflammatory cytokine expression of TNF- $\alpha$ , IL-1 $\beta$ , MCP-1 and ICAM-1 and increases anti-inflammatory factor expression of IL-10 in alveolar epithelial cells treated with H/R.

(A, C, E, G, I) Determining the concentration of TNF- $\alpha$ , IL-1 $\beta$ , IL-10, MCP-1 and ICAM-1 protein concentration in each sample.

(B, D, F, H, J) ELISA measurement of serum TNF- $\alpha$ , IL-1 $\beta$ , IL-10, MCP-1 and ICAM-1 levels in LC3-GFP/CCL149 cells pretreated with DMSO, 3-MA and rapamycin followed by H/R treatment for 0, 2, 4 and 6h(n=5). The results are analyzed in the indicated groups. \* $p \geq 0.05$  compared to control at 0h; # $p < 0.05$  compared to control at 2, 4 and 6h.

**Fig. 7.** Effect of 3-MA and rapamycin on autophagosome and expression of LC3 and Beclin1 in rat lungs treated with I/R.

(A) Transmission electron microscope image showing autophagosomes in lung tissues

from Lewis rats after the rats were lavaged with DMSO, 3-MA and rapamycin in lung ischemia for 2h and reperfusion for 2h. The model group was not treated with ischemia. Arrowheads point to autophagosomes.

**(B)** Western blots showing the protein levels of LC3 and Beclin 1 in lung tissues from Lewis rats after the rats were lavaged with DMSO, 3-MA and rapamycin in lung ischemia for 2h and reperfusion for 2h. The model group was not treated with ischemia.

**(C, D)** The protein levels of LC3 and Beclin 1 in Lewis rats were quantified and analyzed in the indicated groups. # $p < 0.05$  compared to control.

**Fig. 8.** Enhanced autophagy blocks the NF- $\kappa$ B signaling pathway by inhibiting NF- $\kappa$ B expression and increasing I $\kappa$ B expression in rat lungs treated with I/R.

**(A)** Representative images of immunohistochemical staining of a normal rat lung section (model group) and lung sections lavaged with DMSO (control group), 3-MA (3-MA group) and rapamycin (rapamycin) with an antibody against NF- $\kappa$ B or I $\kappa$ B; scale bar, 30 $\mu$ m.

**(B)** Immunohistochemistry analysis of the protein expression of NF- $\kappa$ B and I $\kappa$ B in rat lungs in the indicated groups.

**(C)** Western blots showing the protein levels of NF- $\kappa$ B and I $\kappa$ B in lung tissues from Lewis rats after the rats were lavaged with DMSO, 3-MA and rapamycin in lung ischemia for 2h and reperfusion for 2h. The model group was not treated with ischemia.

**(D, E)** The protein levels of NF- $\kappa$ B and I $\kappa$ B in Lewis rats were quantified and

analyzed in the indicated groups. # $p < 0.05$  compared to control.

**Fig. 9.** Enhanced autophagy suppresses H/R-induced pro-inflammatory cytokine expression of TNF- $\alpha$ , IL-1 $\beta$ , MCP-1 and ICAM-1 and increases anti-inflammatory factor expression of IL-10 in rat lungs treated with I/R.

(A) ELISA measurement of serum IL-1 $\beta$  and TNF- $\alpha$  levels in rat lungs of control, 3-MA and rapamycin groups (n=5). The results are analyzed in the indicated groups.

(B) ELISA measurement of serum IL-10 level in rat lungs of control, 3-MA and rapamycin groups (n=5). The results are analyzed in the indicated groups.

(C) ELISA measurement of serum MCP-1 levels in rat lungs of control, 3-MA and rapamycin groups (n=5). The results are analyzed in the indicated groups.

(D) ELISA measurement of serum ICAM-1 levels in rat lungs of control, 3-MA and rapamycin groups (n=5). The results are analyzed in the indicated groups. # $p < 0.05$  compared to control.

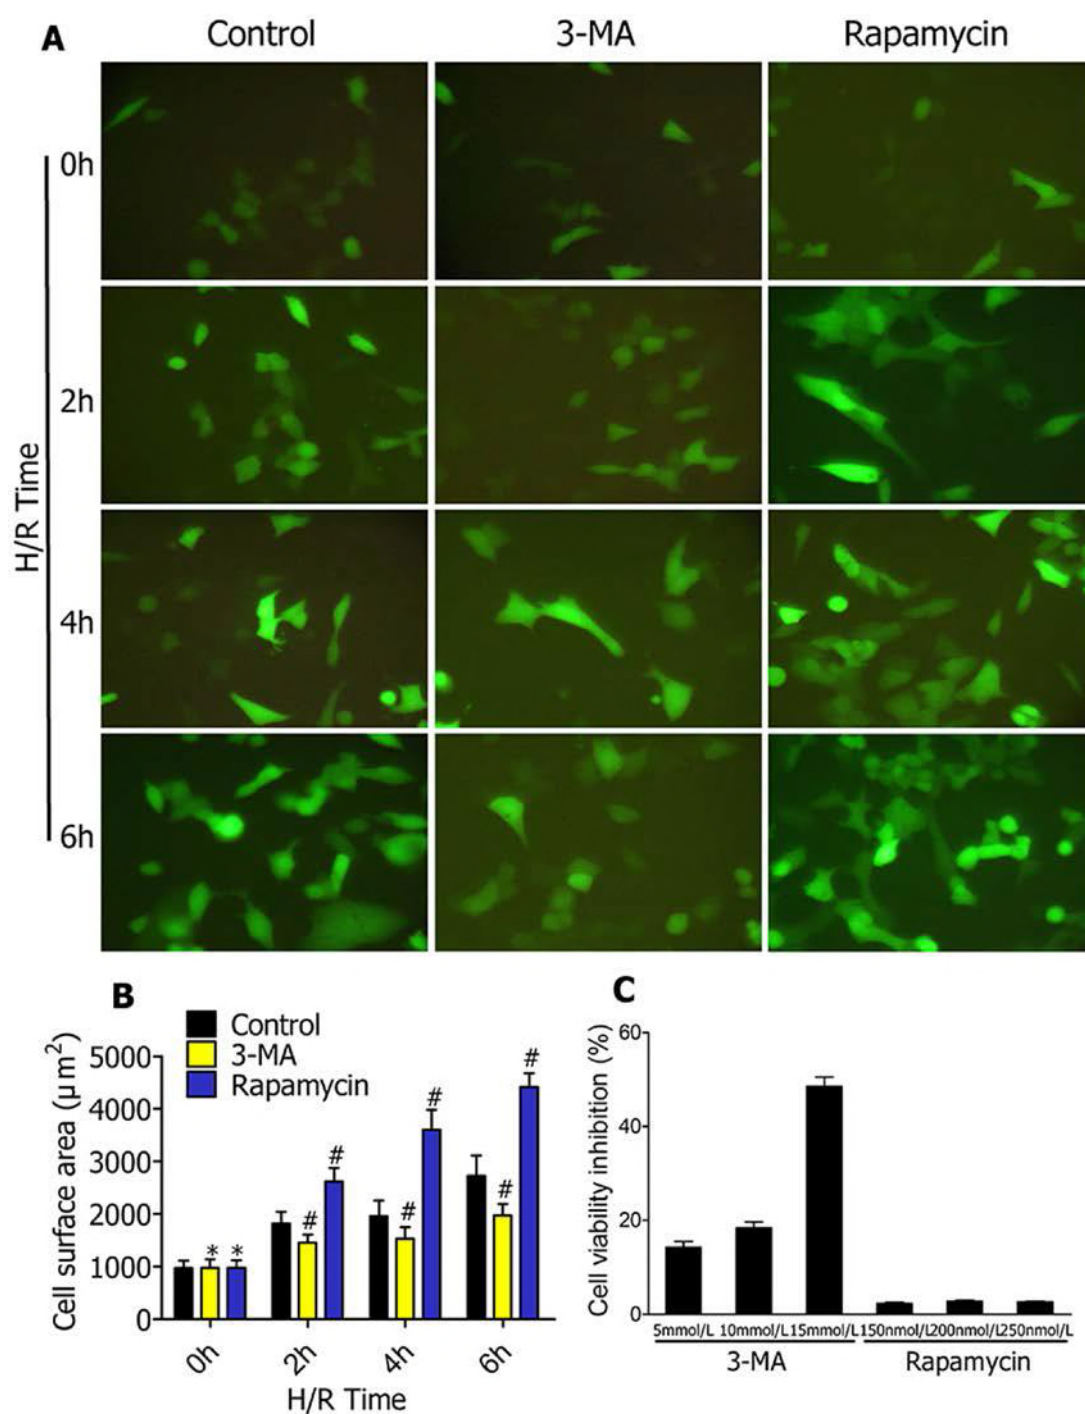



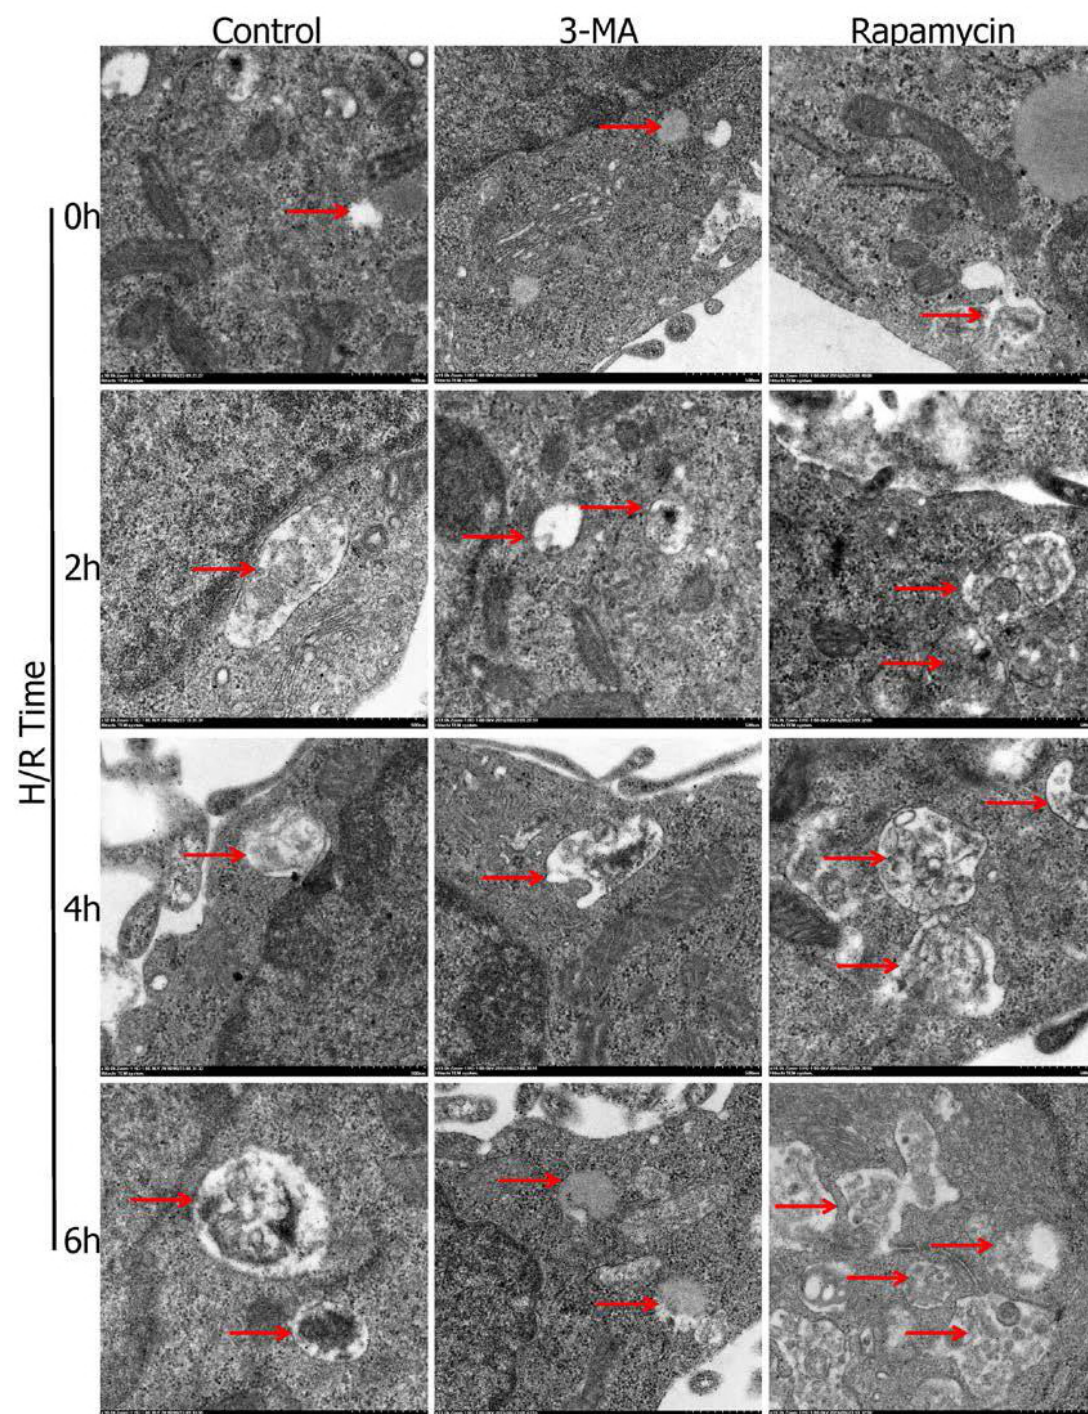



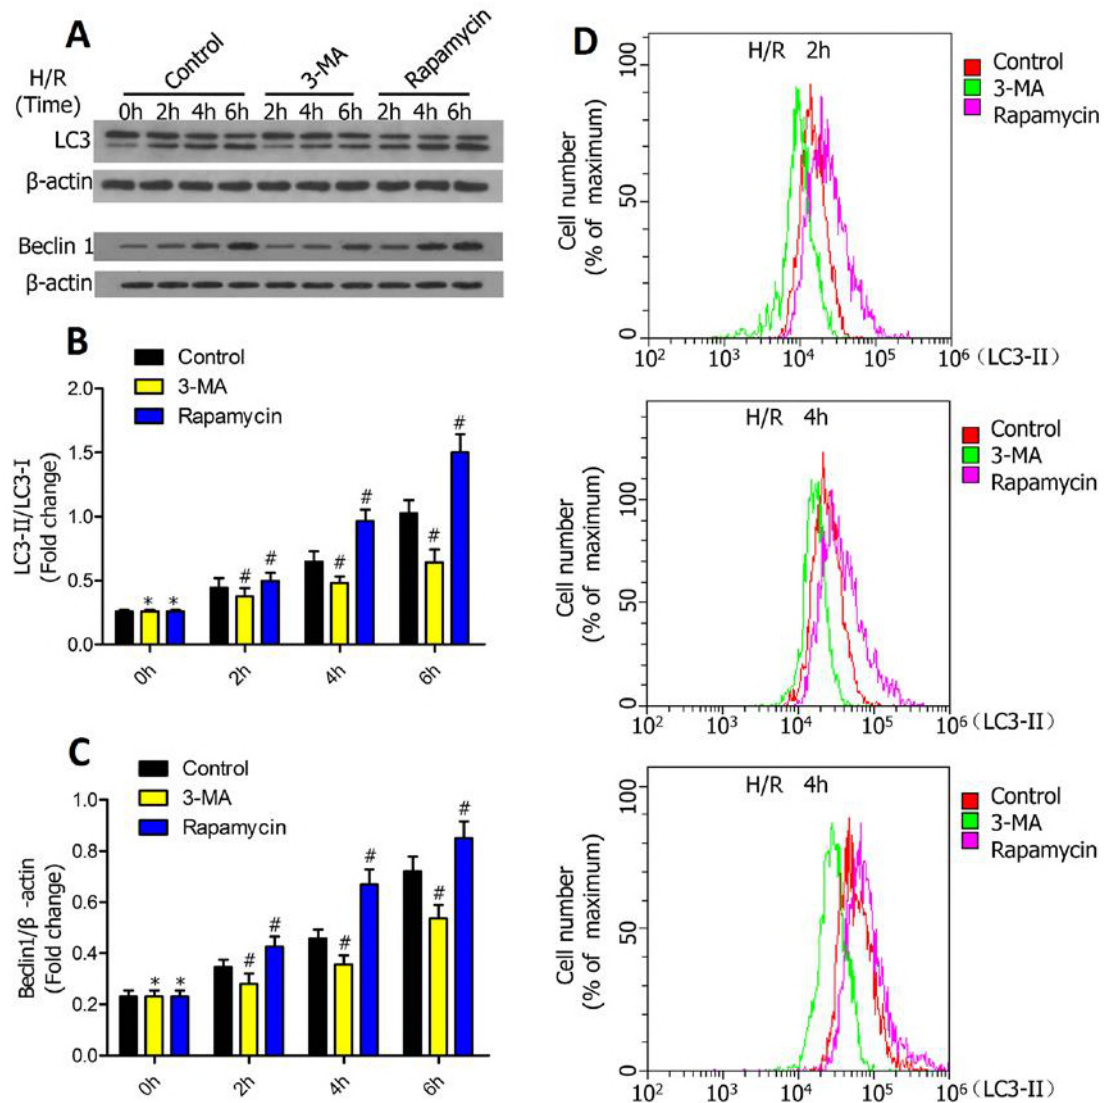

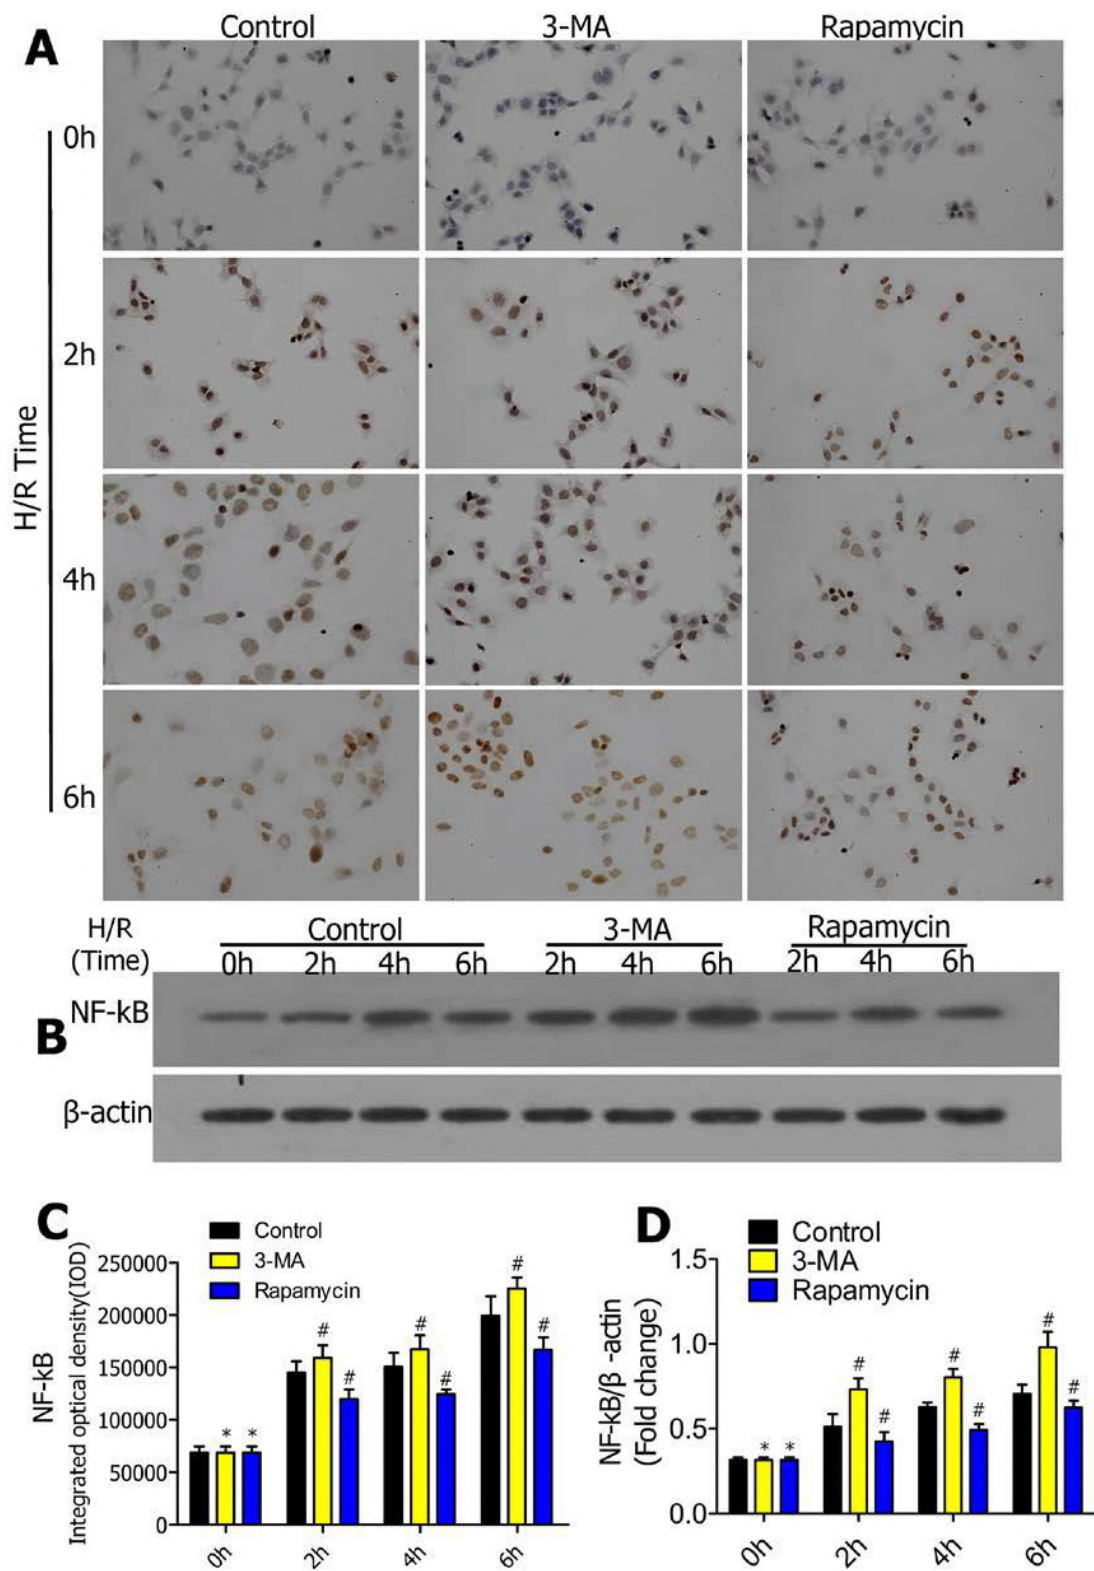

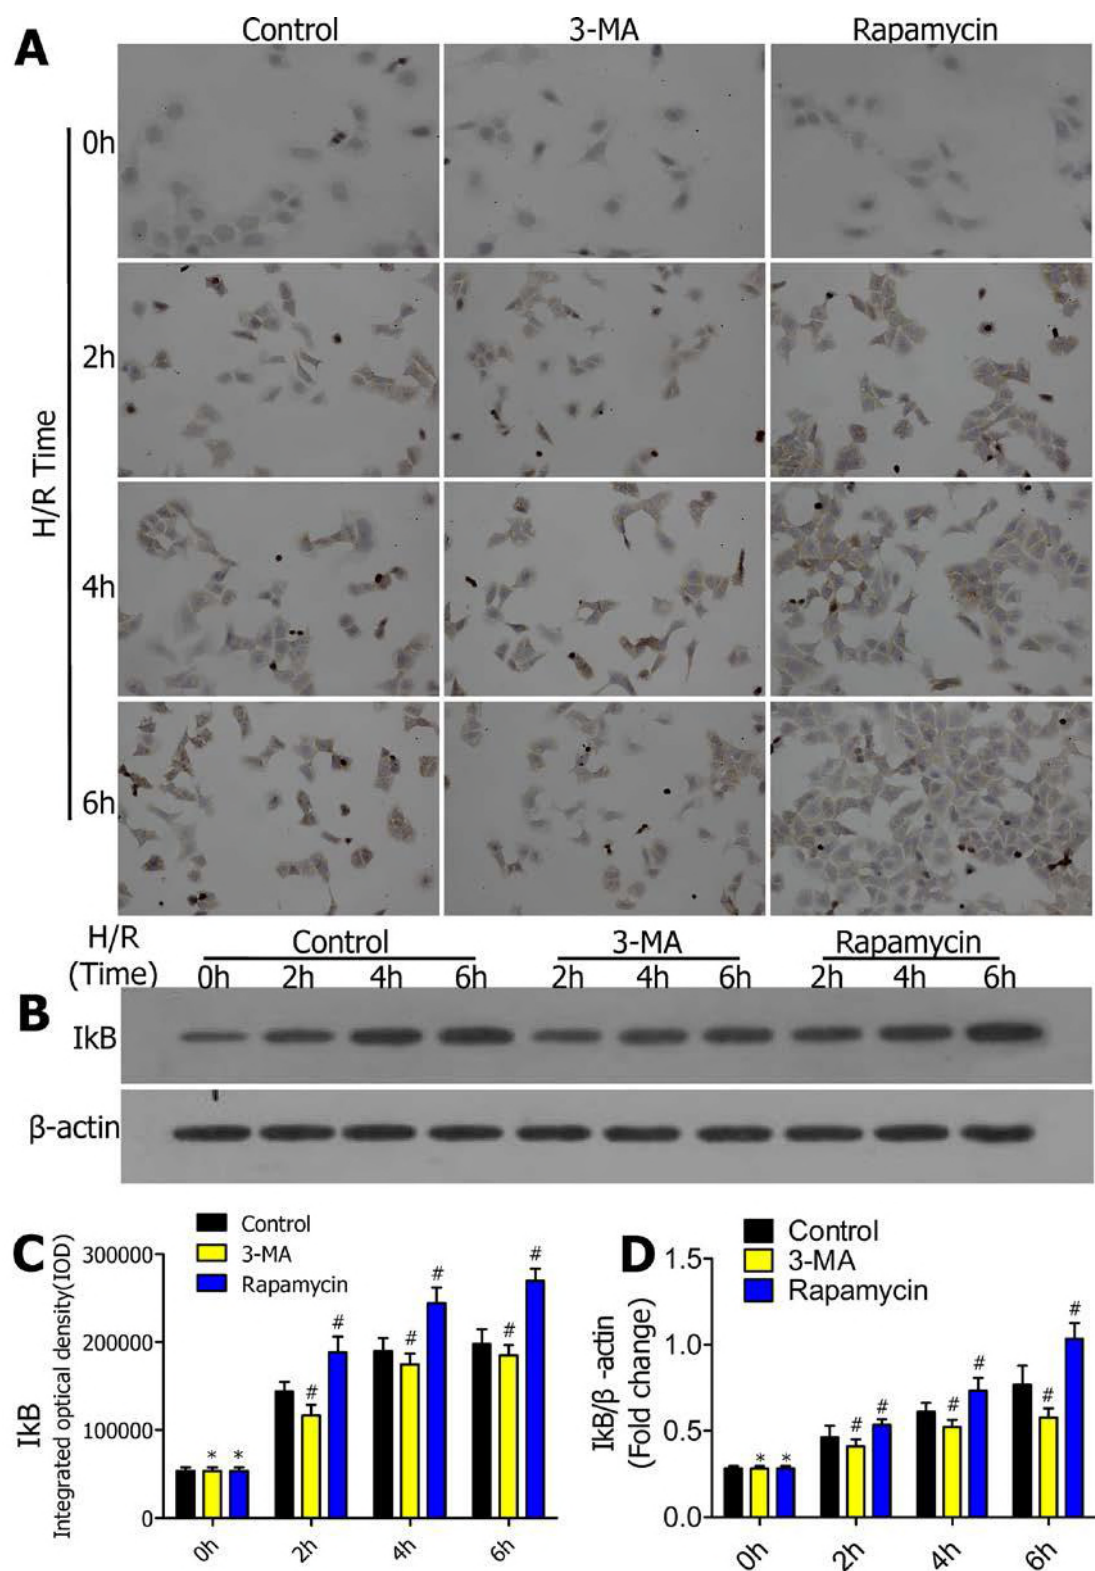

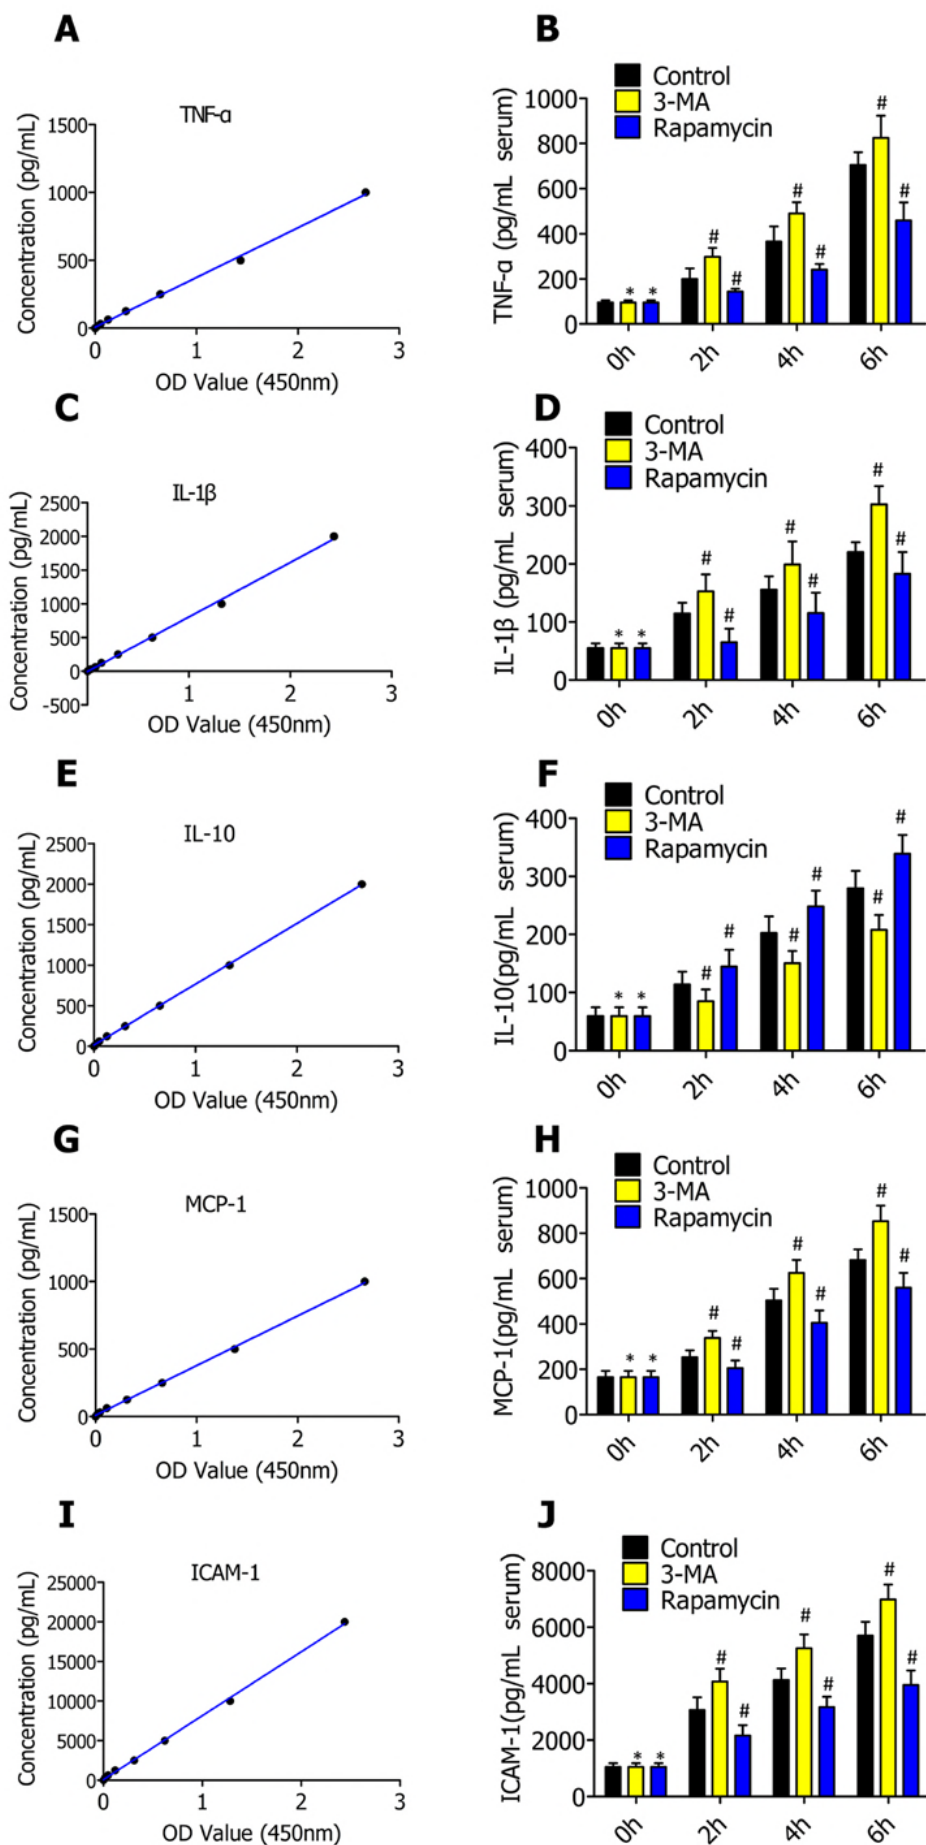



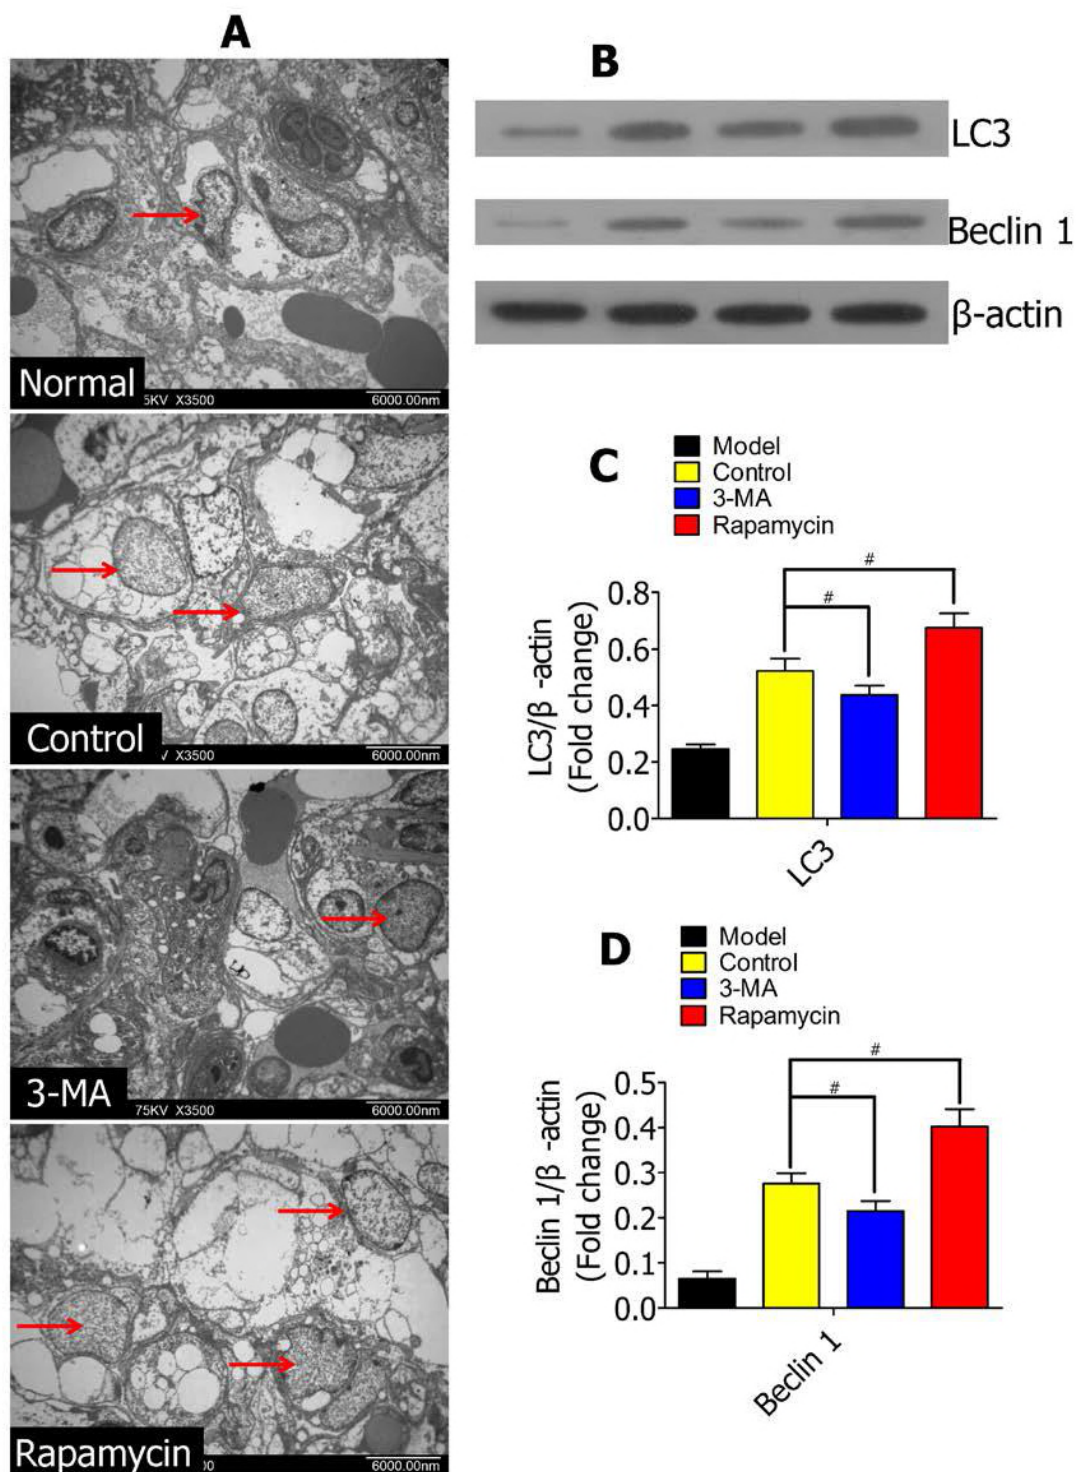

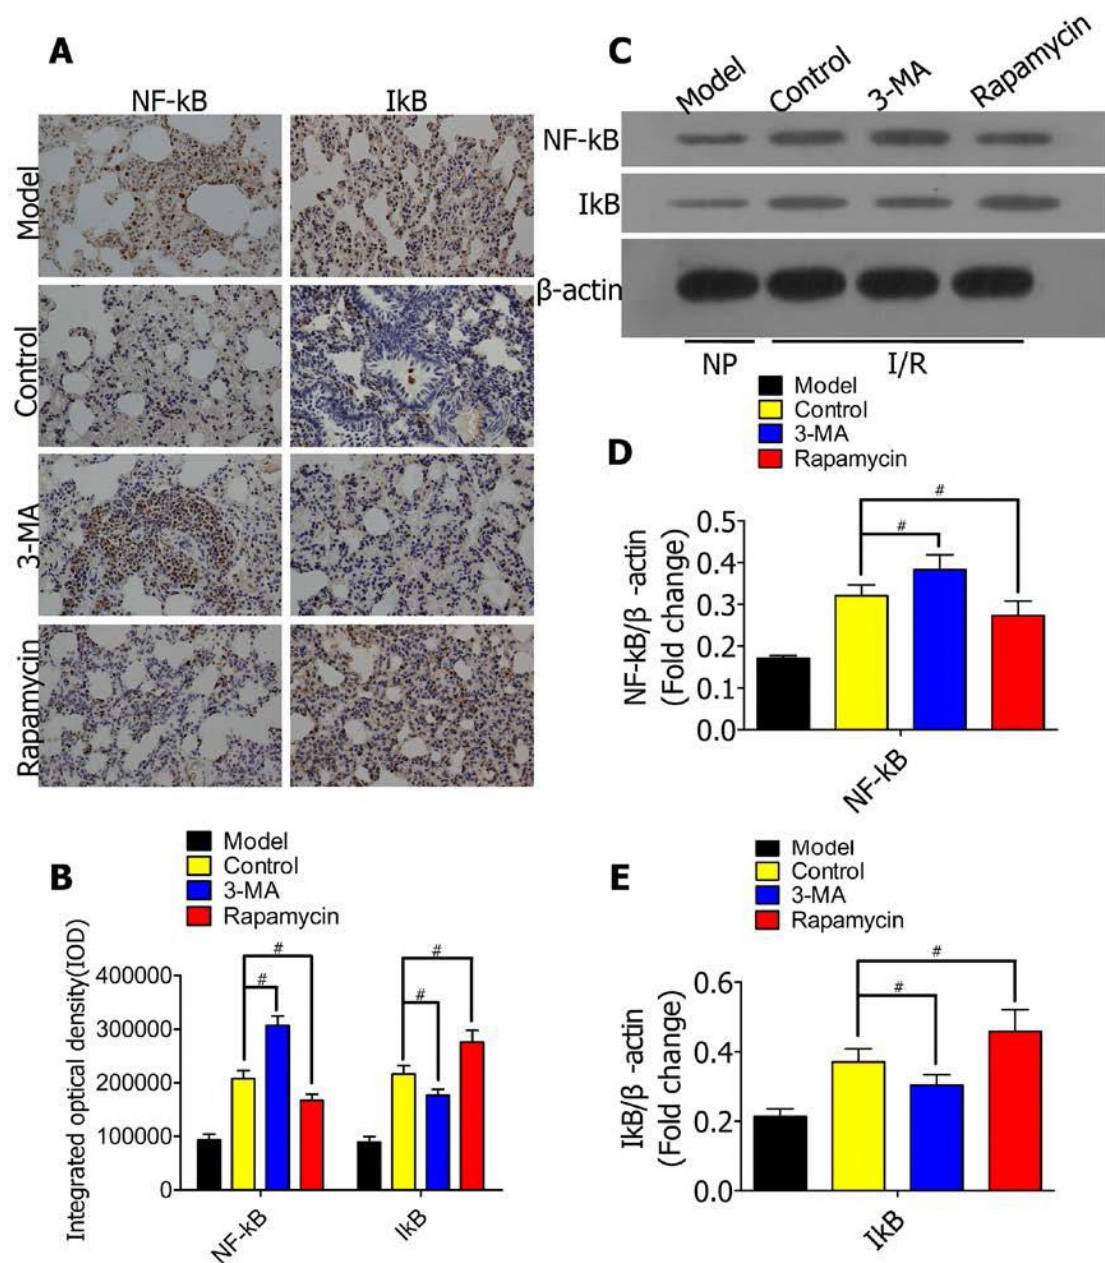

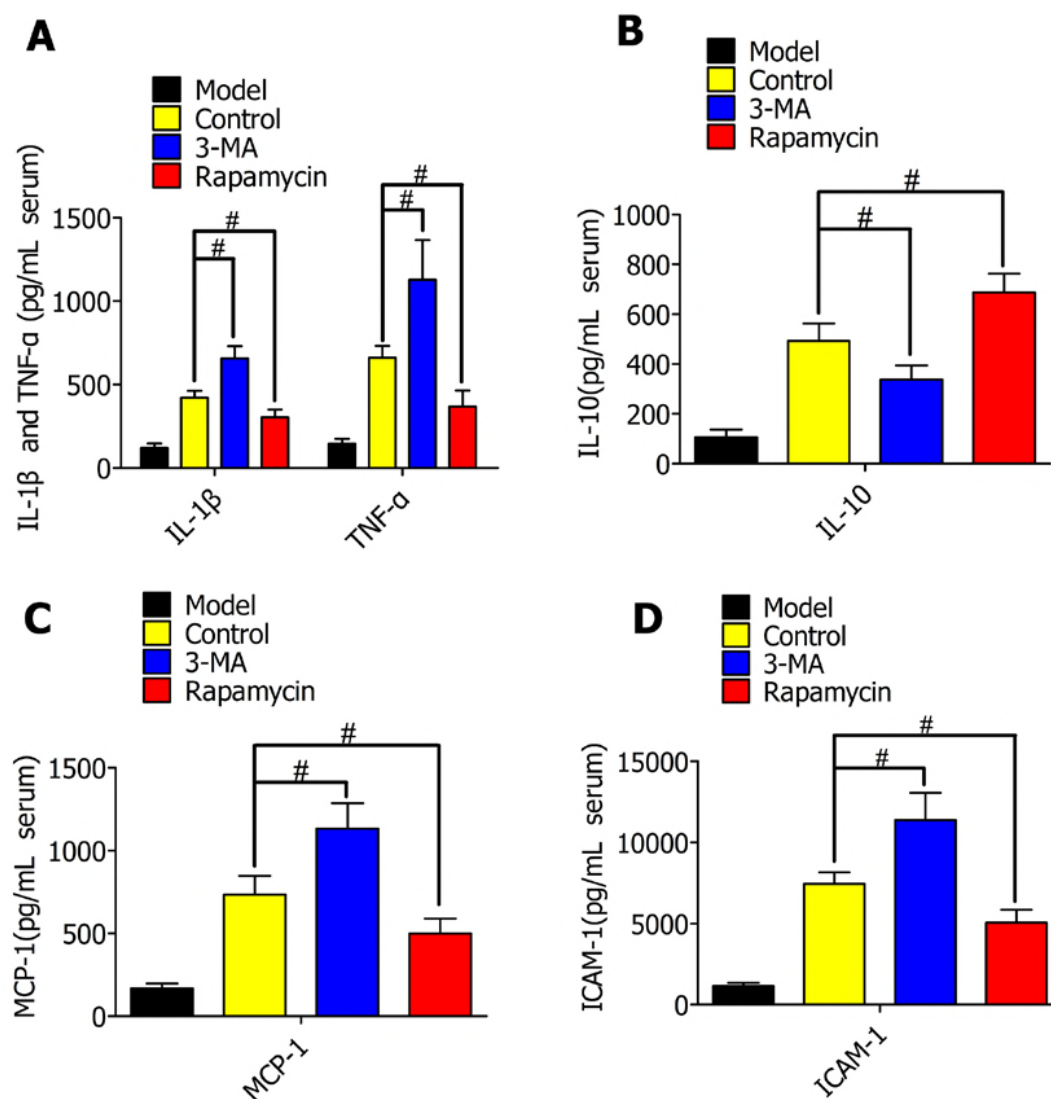

Source: https://www.biorxiv.org/content/10.1101/328039v1.full.pdf
